# Supplementary material for: Shrub type dominates the vertical distribution of leaf C : N : P stoichiometry across an extensive altitudinal gradient
Source: Copernicus journal article supplement (doi:10.5194/bg-2017-484), 2017-12-14
Supplement: Supplementary file [file bg-2017-484-AC1-supplement.zip]

We highly appreciate referee #1 (Dr. Elisabeth Bui) for the helpful suggestions on our manuscript. Our responses are listed below along with the corresponding changes in the text.

**Response to Comments from referee #1:**

***Comment 1:** In the Discussion, landform should be acknowledged as an explanatory factor; montane and valley ecosystems occupy overlapping elevations but different landforms.*

**Response 1:** Thank you for pointing out the effect of different landforms between the montane and valley shrubs (Fig. R1). The explanation related to landform has been provided on lines 412–429: “It should be also noted that the valley shrub possessed the greatest leaf N and high leaf P, especially at altitude of about 1500 m. This result could be explained by the remarkably different landform of valley region from those of montane and subalpine areas with overlapping elevations, which caused distinctive local climate and shrub species in valley. On the one hand, the uplift and geological evolution of the Tibetan Plateau induced steep canyons and longitudinal range-gorge regions, with towering mountains and deep valleys arranged vertically side by side (Royden et al., 2008; Pan et al., 2012). The downvalley wind could result in foehn effect that is characterized by an increase in evaporation rate and a decrease in relative humidity (Hornsteiner, 2005; Li et al., 2007). Consequently, the MAT values of valley sites were higher than montane, subalpine and alpine sites ( $P < 0.05$ , Appendix A: Table A1), indicating faster organic matter decomposition as predicted by the Biogeochemical Hypothesis (Aerts and Chapin, 1999). On the other hand, due to the special local topography and climate, the shrubs in valley were mostly drought-tolerant plants (e.g., *Bauhinia brachycarpa* and *Cotinus coggygia*), which belonged to short-lived, fast-growing deciduous broadleaf functional type. These valley species exhibited faster litter decomposition and nutrient resorption abilities than long-lived, slow-growing evergreen types (Güsewell and Koerselman, 2002; Diehl et al., 2003).”

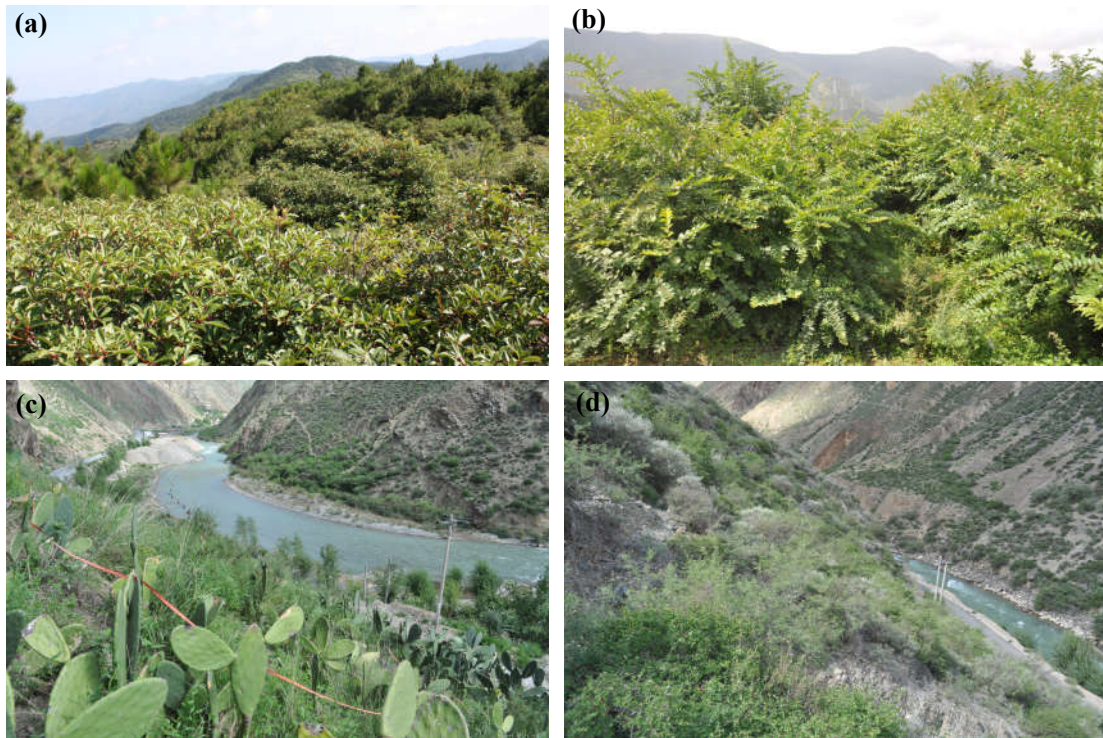

Fig. R1 Different landforms of montane (a, b) and valley (c, d) ecosystems on the Tibetan Plateau, southwest China. Photo credit: Jun Hu.

## References

- Aerts, R., and Chapin III, F. S.: The mineral nutrition of wild plants revisited: A re-evaluation of processes and patterns, *Adv. Ecol. Res.*, 30, 1–67, 1999.
- Diehl, P., Mazzarino, M. J., Funes, F., Fontenla, S., Gobbi, M., and Ferrari, J.: Nutrient conservation strategies in native Andean-Patagonian forests, *J. Veg. Sci.*, 14, 63–70, 2003.
- Güsewell, S., and Koerselman, W.: Variation in nitrogen and phosphorus concentrations of wetland plants, *Perspect. Plant Ecol. Evol. Syst.*, 5, 37–61, 2002.
- Hornsteiner, M.: Local foehn effects in the upper Isar Valley, part 1: Observations, *Meteorol. Atmos. Phys.*, 88, 175–192, 2005.
- Li, Y., Liu, X., Zheng, S., Chen, H., Yue, Y., Mu, C., and Liu, J.: Drought-resistant physiological characteristics of four shrub species in arid valley of Minjiang River, China, *Acta Ecologica Sinica*, 27, 870–877, 2007.
- Pan, T., Wu, S., He, D., Dai, E., and Liu, Y.: Ecological effects of longitudinal range-gorge land surface pattern and its regional differentiation, *Acta Geographica Sinica*, 67, 13–26, 2012.

Royden, L. H., Burchfiel, B. C., and van der Hilst, R. D.: The geological evolution of the Tibetan Plateau, *Science*, 321, 1054–1058, 2008.

**Comment 2:** *I think a key missing factor is the nutrient acquisition process of the shrubs—this may be why shrub type accounts for more of leaf nutrient variation than climate or soil. Is there a mycorrhizal association that helps *Rhododendron telmateium* acquire nutrients? Are there rhizobial nodules on *Bauhinia brachycarpa*?*

**Response 2:** Many thanks for the excellent suggestion on the key missing factor – nutrient acquisition strategy. This part can largely explain why the leaf nutrient levels differed among shrub species, and provide further evidence for the dominant role of shrub type in leaf element variations. We have added some discussion on lines 442–462: “Plant nutrient acquisition strategy could also affect leaf nutrient levels of different shrub species. It is well known that most plants belonging to Ericales are able to associate with soil fungi and form ericoid mycorrhiza (Perotto et al., 2002). This happens especially in high-altitude environment where plant litter decomposes slowly, leading to acidic soils rich in recalcitrant organic matter but low in available mineral nutrients (Cairney and Burke, 1998). Previous studies have reported that ericoid mycorrhiza or arbuscular mycorrhizal fungi (AMF) were associated with diverse rhododendrons in southwestern China and central Himalayan (Chaurasia et al., 2005; Tian et al., 2011). The alpine shrub species *Rhododendron telmateium* in similar regions probably also formed mycorrhizal fungal structures to enhance its survival and growth under stressed environments. *Rhododendron telmateium* may access unavailable organic N and P via the enzymatic degradation of soil organic polymers by mycorrhizal fungi (Näsholm and Persson, 2001), resulting in higher leaf N and P contents compared to *Coriaria sinica*. In addition, the valley shrub *Bauhinia brachycarpa* in our study exhibited relatively high leaf N and P levels (although insignificant), despite its low soil total nutrients relative to alpine and subalpine shrub species (Appendix A: Table A1). This leguminous species possibly interacts symbiotically with soil microorganisms to form fungal assemblages or nitrogen-fixing root nodules, improving its nutrient acquisition in infertile soil. It has been verified that a high level of AMF diversity

occurred in the rhizosphere of another dominant valley shrub species (*Bauhinia faberi*) on the Tibetan Plateau (Chen et al., 2016).”

## References

- Cairney, J. W. G., and Burke, R. M.: Extracellular enzyme activities of the ericoid mycorrhizal endophyte *Hymenoscyphus ericae* (Read) Korf & Kerner: their likely roles in decomposition of dead plant tissue in soil, *Plant Soil*, 205, 181–192, 1998.
- Chaurasia, B., Pandey, A., and Palni, L. M. S.: Distribution, colonization and diversity of arbuscular mycorrhizal fungi associated with central Himalayan rhododendrons, *Forest Ecol. Manag.*, 207, 315–324, 2005.
- Chen, Y., Qu, L. Y., Ma, K. M., Yang, X. Y.: The community composition of arbuscular mycorrhizal fungi in the rhizosphere of *Bauhinia faberi* var. *microphylla* in the dry valley of Minjiang River, *Mycosystema*, 35, 39–51, 2016.
- Näsholm, T., and Persson, J.: Plant acquisition of organic nitrogen in boreal forests, *Physiol. Plant*, 111, 419–426, 2001.
- Perotto, S., Girlanda, M., and Martino, E.: Ericoid mycorrhizal fungi: some new perspectives on old acquaintances, *Plant Soil*, 244, 41–53, 2002.
- Tian, W., Zhang, C. Q., Qiao, P., and Milne, R.: Diversity of culturable ericoid mycorrhizal fungi of *Rhododendron decorum* in Yunnan, China, *Mycologia*, 103, 703–709, 2011.

**Comment 3:** line 441, *N-limited* instead of *N-limiting*?

**Response 3:** The “N-limiting” has been replaced by “N-limited” on line 472.
